# Supplementary material
Source: PubMed Central journal article supplement (PMC4550827)

## ***POLG2* Disease Variants: Analyses Reveal a Dominant Negative Heterodimer, Altered Mitochondrial Localization, and Impaired Respiratory Capacity**

**Matthew J. Young, Margaret M. Humble, Karen L. DeBalsi, Kathie Y. Sun, and William C. Copeland**

### **SUPPLEMENTARY MATERIAL**

**Supplementary Figure 1. Denaturing PAGE analysis of functional interaction reactions containing p55 heterodimer variants.** Reactions were setup as described in Figure 2 and then loaded onto a 12% polyacrylamide gel. Primer, no protein added to the reaction; L, low salt (none added to the reaction); H, high salt (reactions supplemented with 150 mM NaCl); 140, p140 catalytic subunit only; WT, WT p55; P, WT/P205R; R, WT/R369G; G, WT/G451E; L, WT/L475DfsX2 p55 heterodimers.

**Supplementary Figure 2. Standard XF24 bioenergetic assay OCR profiles.** OCR profiles of the mitochondrial bioenergetics parameters of **A**, HEK293 untransfected cells and NGFP p55 transfected variant stable cell lines: **B**, P205R, **C** R369G, **D** G451E and **E** L475DfsX2. The mitochondrial stress test profile measures the four key parameters of mitochondrial function in cells grown in a microplate: basal respiration, ATP production, proton leak and maximal respiration following the addition of indicated compounds.

**Supplementary Figure 3. Bioenergetic parameters for stable cell lines.** **A**, ATP production for all cell lines as measured by the change in OCR following the addition of oligomycin. **B**, Proton leak for all cell lines as determined by the difference between oligomycin sensitive ATP coupled OCR production and non-mitochondrial O<sub>2</sub> consumption.

**Supplementary Figure 4. Homogeneous preparations of P205R and L475DfsX2 p55 variants form aberrant reducible multimers.** Partial denaturing PAGE analysis was utilized to analyze homogeneous preparations of WT and variant p55s. Samples of 0.62 mg purified WT p55 or variant were resuspended in 0.03% SDS sample buffer with or without β-mercaptoethanol and incubated with or without heating followed by visualization by Western blotting (Materials and Methods). W or WT, WT p55; P or P205R, P205R p55; L or L475D, L475DfsX2 p55. Molecular weight standards (kDa) are indicated on the left-hand-side of the gel. Note, we predict that weaker detection of the ~55 kDa band by anti-p55 in samples

treated with heat and b-mercaptoethanol results from disruption of antibody-recognized secondary and tertiary structural elements.

## **SUPPLEMENTARY METHODS**

*Partial denaturing PAGE* – Samples of 0.62 mg purified p55 WT or variant p55 homodimers were individually prepared in 0.03% SDS sample buffer consisting of 31.25 mM Tris-HCl, pH 6.8, 7.5% glycerol, 0.005% bromophenol blue, and 0.03% sodium dodecyl sulfate (SDS). Homodimeric p55 variants were prepared as previously described (13). When sample buffer was supplemented with b-mercaptoethanol the final concentration was 3%. Samples were heated at 95°C or incubated at room temperature for 5 minutes, followed by analysis on a Criterion™ XT 4-12% Bis-Tris gel in XT MES running buffer (Bio-Rad). Resolved proteins were then electrotransferred to Immobilon-P PVDF (polyvinylidene fluoride) membrane (Millipore) and bands were visualized by Western blotting and immunodetection as described above for HIS-tag protein detection with the exception that the primary antibody used for p55 detection was a 1/100 dilution of anti-p55 rabbit polyclonal antiserum (19) in 5 g non-fat dry milk in 100 ml TN buffer and the secondary antibody was a 1/3000 dilution of goat anti-rabbit alkaline phosphatase conjugate (Bio-Rad) in TN buffer with 1 mg/ml BSA.

Sup Fig 1.

140 WT P R G L  
LHLHLHLHLHLH

Primer

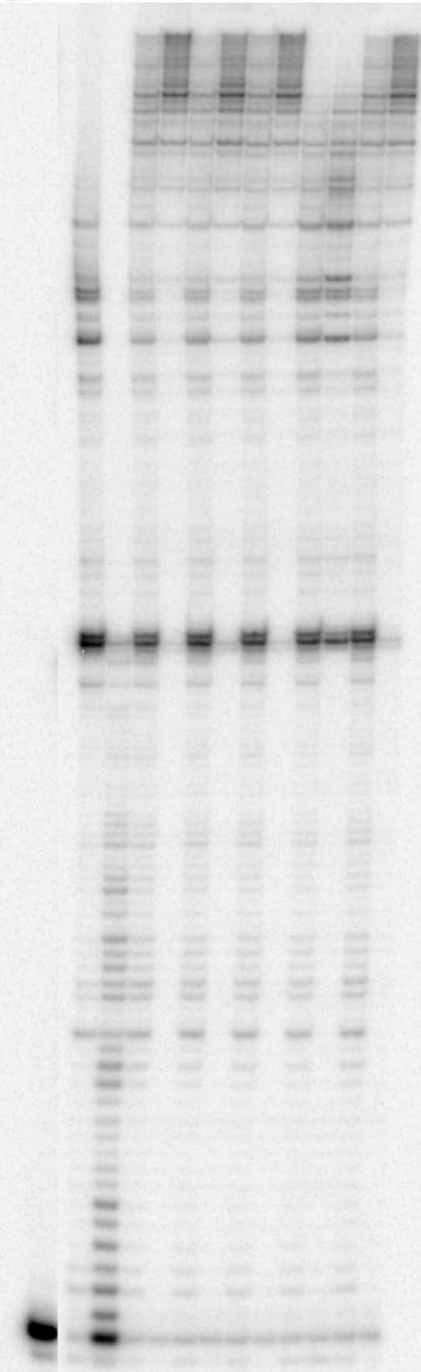

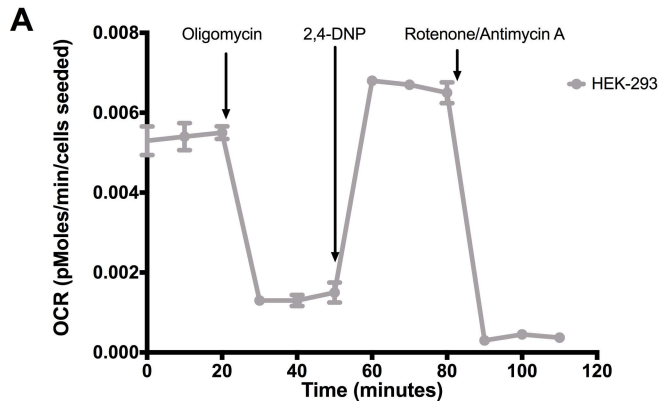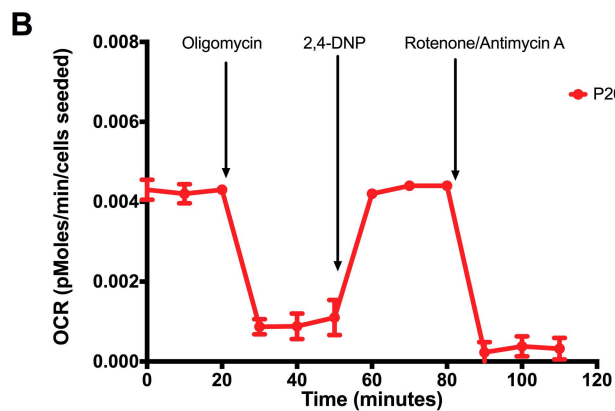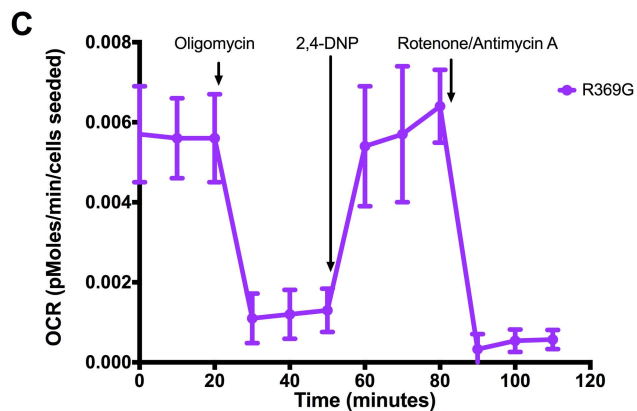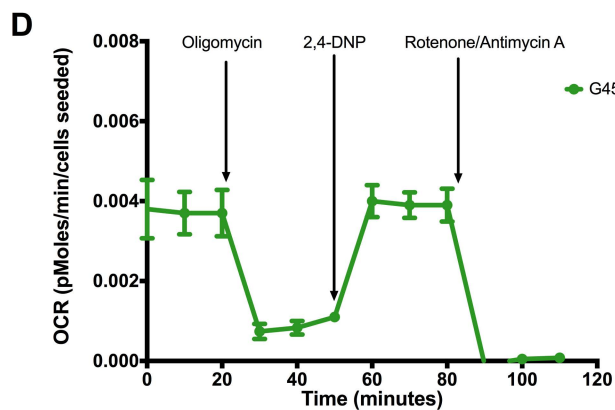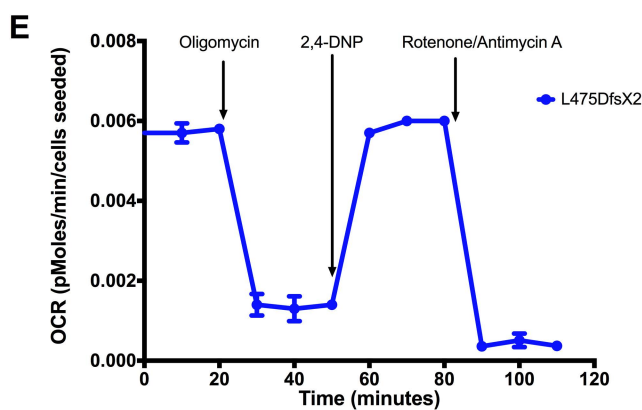

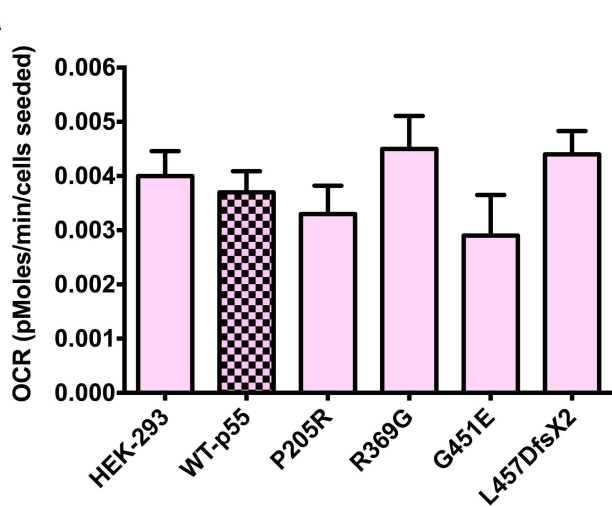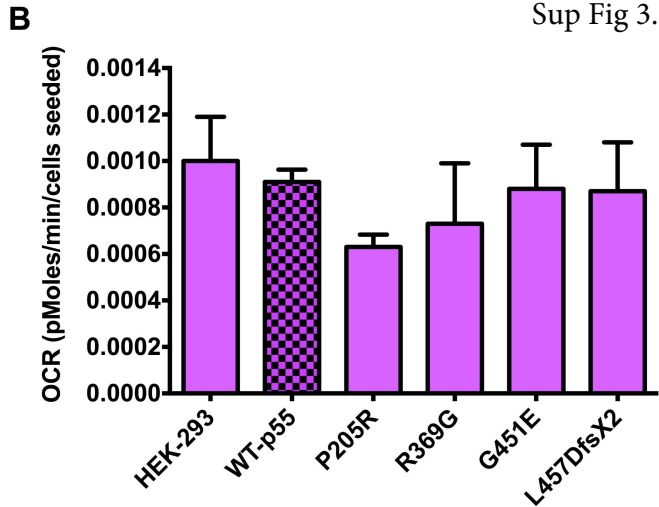

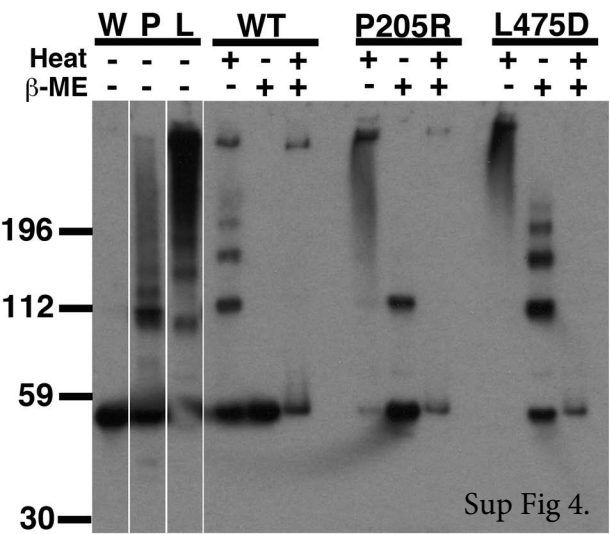

Supplement: supp_ddv240_ddv240supp.pdf [file supp_ddv240_ddv240supp.pdf]
